# Supplementary material for: Gene-Centric Meta-Analysis of Lipid Traits in African, East Asian and Hispanic Populations
Source: PubMed Central journal article supplement (PMC3517599; doi:10.1371/journal.pone.0050198), 2012-12-07

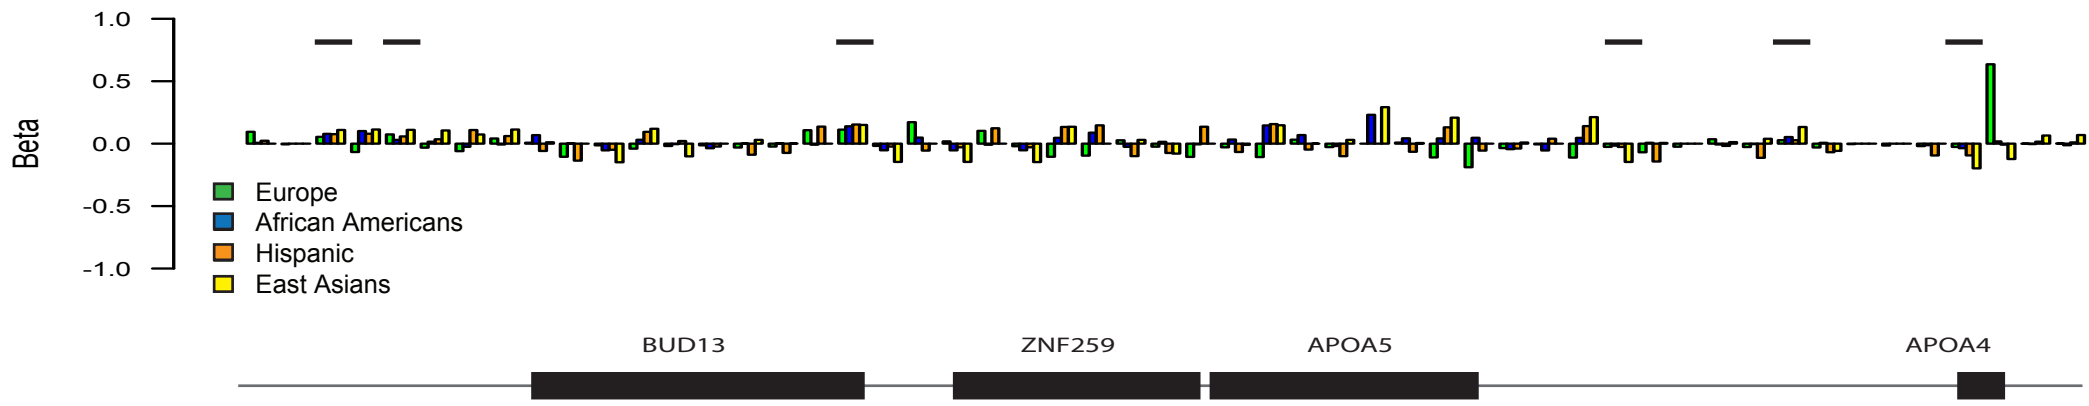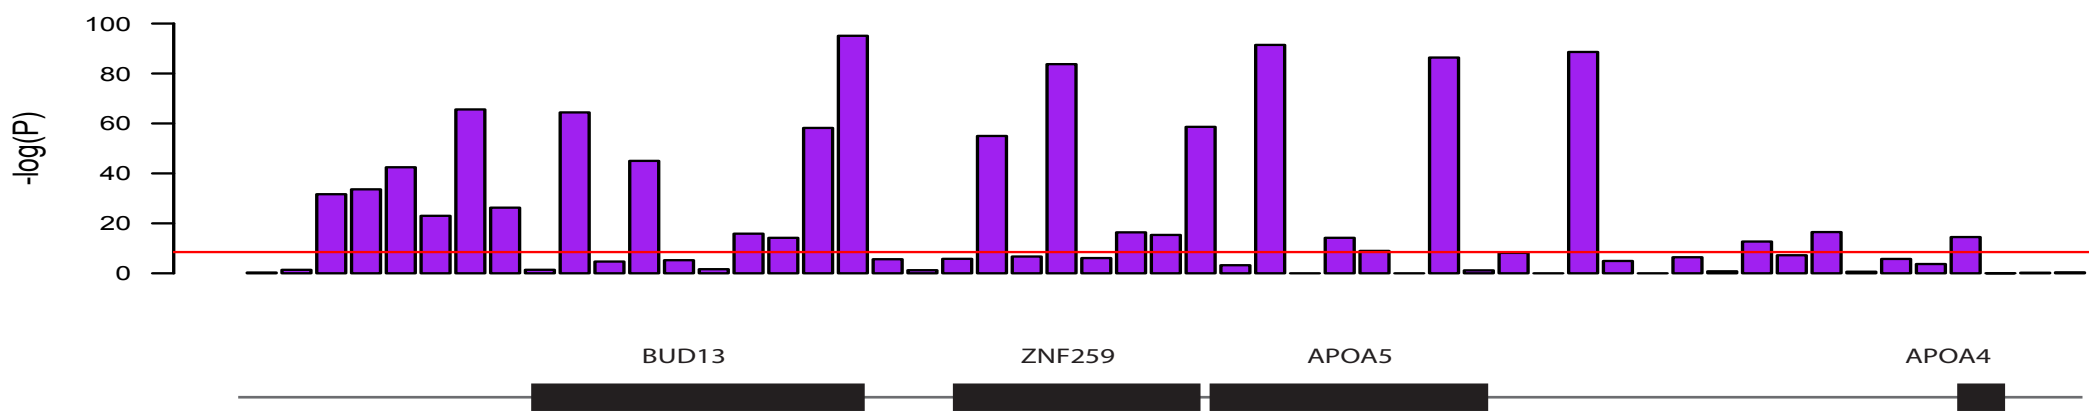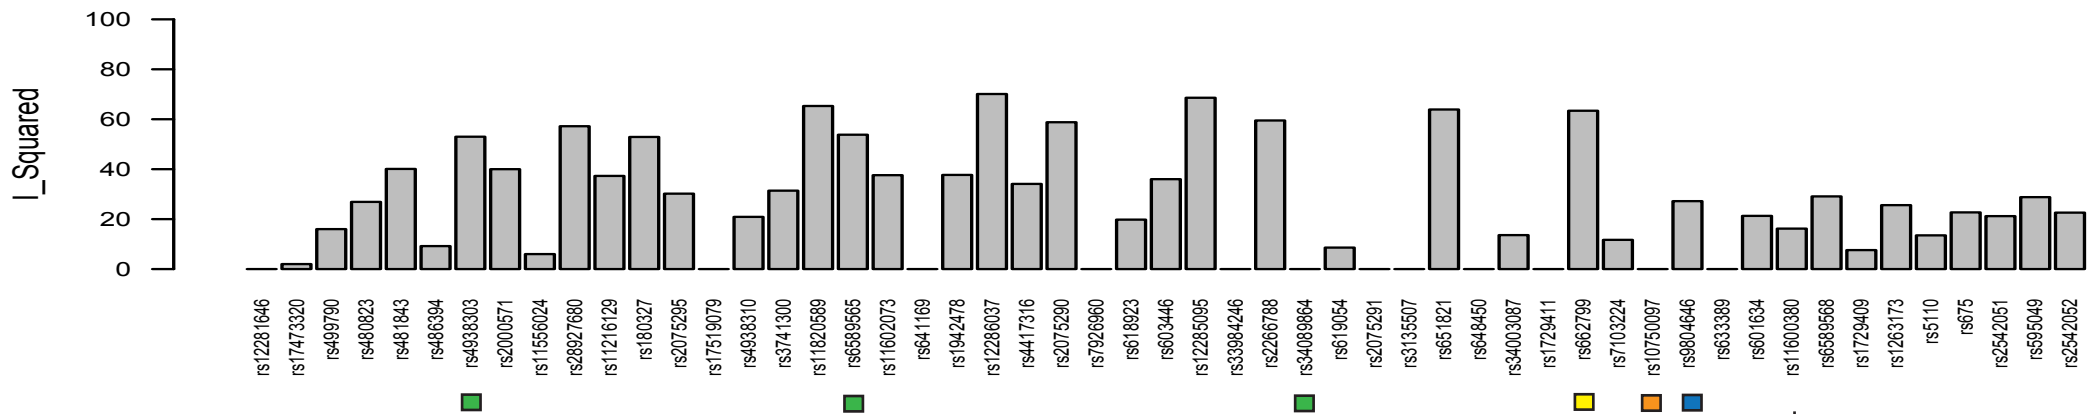

Supplement: pone.0050198.s002.pdf [file pone.0050198.s002.pdf]
