# Supplementary material for: Gene-Centric Meta-Analysis of Lipid Traits in African, East Asian and Hispanic Populations
Source: PLoS One. 2012 Dec 7;7(12):e50198. doi: 10.1371/journal.pone.0050198 (PMC3517599; doi:10.1371/journal.pone.0050198)
Supplement: Table S1 — Characteristics of studies contributing to the multi-ethnic IBC lipids meta-analyses. (XLSX) [file pone.0050198.s005.xlsx]

## Sheet: Sheet1
Table S 1. Characteristics of studies contributing to the Multiethnic IBC Lipid meta-analyses.
Discovery Studies	Recruitment design	Year of collection	N total*	Individual level data	N AA*	N Hispanic	N East Asian	Key Reference (PMID)
ARIC†	Community-based	1985-2006	2687	Yes	2687	0	0	20400780
CARDIA†	Community-based	1985-2003	1024	Yes	1024	0	0	20400780
CHS†	Community-based	1988-2005	701	Yes	701	0	0	20400780
MESA†	Community-based	1999-2009	3305	Yes	1584	1175	546	20400780
SHARE	Population-based	2004-2007	173	Yes	0	0	173	11071182
WHI	Multiple	1993-1998	805	Yes	543	140	122	9492970
JHS†	Population-based	2000-2004	0	Yes	1118	0	0	20400780
Total	-	-	9813	-	7657	1315	841	-
Replication Studies	Recruitment design	Year of collection	N total*	Individual level data	N AA*	N Hispanic*	N East Asian*	Key Reference (PMID)
HANDLS	Community-based	2004-2008	848	No	848	0	0	20184988
HealthABC	Community-based	1997-1998	1088	No	1088	0	0	10865790
FamHS	Population-based	1992-2003	612	No	612	0	0	8651220
GeneStar	Healthy relatives of CAD cases	1982-2006	1142	No	1142	0	0	17663734
HeartSCORE	Community-based	2003-	439	No	439	0	0	17239697
SIGNET	Multiple	1995-2007	2871	No	2871	0	0	15990444, 18835935, 20507373
Total	-	-	7000	-	7000	-	-	-
Abbreviations: Atherosclerosis Risk In Communities (ARIC); Coronary Artery Risk Development in Young Adults (CARDIA); Cardiovascular Health Study (CHS); Multi-Ethnic Study of Atherosclerosis (MESA); Study of Health and Atherosclerosis risk in multiple Ethnicities(SHARE); Women's Health Initiative (WHI); Jackson Heart Study (JHS); The Healthy Aging in Neighborhoods of Diversity Across the Life Spa…
