# Supplementary material for: Gene-Centric Meta-Analysis of Lipid Traits in African, East Asian and Hispanic Populations
Source: PLoS One. 2012 Dec 7;7(12):e50198. doi: 10.1371/journal.pone.0050198 (PMC3517599; doi:10.1371/journal.pone.0050198)
Supplement: Table S3 — Association results for known lipids loci in Europeans, African-Americans, Hispanics and East Asians. (XLSX) [file pone.0050198.s007.xlsx]

## Sheet: Sheet1
Table S 3a. Association results for known TC loci in Europeans, African-Americans, Hispanics and East Asians
			Europeans			African Americans			Hispanics			East Asians
Gene	SNP	RA	RAF	Beta (SE)	P	RAF	Beta (SE)	P	RAF	Beta (SE)	P	RAF	Beta (SE)	P	Direction
PCSK9	rs11591147	G	0.9852	0.3652 (0.0238)	3.813e-53	0.9955	0.4292 (0.1309)	0.001044	0.9882	0.1988 (0.1817)	0.274	NA	NA	NA	+++.
ANGPTL3	rs11207997	C	0.666	0.0701 (0.0062)	1.707e-29	0.445	0.042 (0.017)	0.01367	0.6177	0.021 (0.0402)	0.6007	0.7237	-0.2807 (0.1255)	0.02535	+++-
CELSR2	rs646776	T	0.7802	0.1255 (0.0071)	2.07e-70	0.6444	0.0951 (0.0173)	3.963e-08	0.7705	0.2125 (0.0442)	1.562e-06	0.9275	0.158 (0.0855)	0.06448	++++
APOB	rs562338	G	0.8166	0.1264 (0.0081)	5.057e-55	0.4035	0.0886 (0.017)	2.002e-07	0.8029	0.0846 (0.0515)	0.1005	0.9888	0.3236 (0.2262)	0.1525	++++
GCKR	rs1260326	T	0.4142	0.0498 (0.006)	7.381e-17	0.1487	0.0563 (0.0233)	0.0158	0.3322	-0.0201 (0.0413)	0.6269	0.5009	0.0267 (0.0468)	0.5678	++-+
ABCG8	rs4299376	G	0.3193	0.069 (0.0063)	3.091e-28	0.1736	0.0778 (0.0238)	0.001062	0.2261	0.0782 (0.045)	0.08209	0.0047	0.2836 (0.3842)	0.4603	++++
HMGCR	rs12916	C	0.4059	0.0768 (0.006)	5.934e-38	0.2532	0.0333 (0.0188)	0.07669	0.3903	0.0478 (0.0406)	0.2385	0.5321	0.0551 (0.0461)	0.2323	++++
HLA-DRA	rs17496549	T	0.1153	0.055 (0.0093)	3.2e-09	0.0813	0.0267 (0.0304)	0.3794	0.0862	0.0064 (0.0694)	0.9265	0.03	0.0344 (0.1354)	0.7996	++++
LPA	rs10455872	G	0.0718	0.105 (0.0116)	1.476e-19	0.0134	0.1904 (0.0741)	0.01021	0.0342	0.1703 (0.1074)	0.113	NA	NA	NA	+++.
CYP7A1	rs8192870	T	0.3464	0.031 (0.0062)	5.435e-07	0.1541	-0.0272 (0.0228)	0.2318	0.2341	0.0168 (0.0458)	0.7144	0.2072	-0.0241 (0.0553)	0.6631	+-+-
TRIB1	rs2954029	A	0.5328	0.057 (0.0061)	1.798e-20	0.6627	0.0038 (0.0176)	0.8283	0.6036	0.0843 (0.039)	0.03067	0.4843	0.0343 (0.0458)	0.4544	++++
ABCA1	rs2575876	G	0.7472	0.0538 (0.0067)	1.349e-15	0.7934	0.0258 (0.0203)	0.2034	0.7441	0.0292 (0.0453)	0.5189	0.7697	0.1004 (0.0551)	0.06856	++++
ENDOG	rs2280845	C	0.7492	0.0329 (0.0067)	1.086e-06	0.3606	0.0091 (0.0175)	0.6026	0.7424	-0.0231 (0.0457)	0.6131	0.7084	-0.0257 (0.0476)	0.5895	++--
ABO	rs651007	T	0.2267	0.0426 (0.007)	1.498e-09	0.138	0.0644 (0.0241)	0.007572	0.1565	0.0707 (0.0538)	0.1885	0.1898	0.1109 (0.0565)	0.04966	++++
FADS2	rs174601	C	0.6388	0.0394 (0.0061)	9.885e-11	0.4006	-0.0163 (0.0169)	0.3353	0.3832	0.0385 (0.042)	0.3586	0.4069	-0.0048 (0.0445)	0.9146	+-+-
APOA5	rs12287066	T	0.0673	0.0807 (0.0118)	7.346e-12	0.1723	-0.0112 (0.0218)	0.6083	0.1455	0.0581 (0.0543)	0.2853	NA	NA	NA	+-+.
SH2B3	rs3184504	C	0.5055	0.0403 (0.0062)	7.845e-11	0.9137	0.0458 (0.0308)	0.1373	0.7174	0.1424 (0.0434)	0.001026	NA	NA	NA	+++.
TCF1	rs2244608	G	0.3358	0.0369 (0.0062)	2.542e-09	0.1431	0.0125 (0.0237)	0.5974	0.3399	-0.0365 (0.0411)	0.3737	0.3658	-0.0365 (0.0472)	0.4398	++--
GAS6	rs6602910	G	0.3837	0.0343 (0.006)	1.437e-08	0.8244	0.0467 (0.0224)	0.03655	0.4992	0.029 (0.0387)	0.4525	0.4602	0.0601 (0.0465)	0.1967	++++
LIPC	rs261332	A	0.203	0.058 (0.0073)	1.44e-15	0.2386	-0.0058 (0.0192)	0.7623	0.1623	0.0283 (0.0527)	0.5909	0.1442	0.0099 (0.0666)	0.8814	+-++
CETP	rs11076176	T	0.8324	0.0598 (0.0082)	3.08e-13	0.5899	0.0027 (0.022)	0.9019	0.6859	0.0796 (0.0414)	0.05431	0.7055	-0.0314 (0.0494)	0.5254	+++-
HPR	rs2000999	A	0.1979	0.0556 (0.0074)	3.754e-14	NA	NA	NA	0.1996	-0.032 (0.196)	0.8702	0.2795	0.0655 (0.0484)	0.1753	+.-+
LIPG	rs1943981	T	0.8349	0.0515 (0.0079)	6.953e-11	0.9481	0.012 (0.0377)	0.7507	0.9129	0.0148 (0.0685)	0.829	0.8654	0.1274 (0.0646)	0.04871	++++
LDLR	rs6511720	G	0.8826	0.1623 (0.0091)	1.294e-71	0.8622	0.1772 (0.024)	1.389e-13	0.9157	0.166 (0.0696)	0.01717	0.9906	0.1755 (0.2503)	0.4832	++++
GATAD2A	rs3794991	C	0.9135	0.1167 (0.0104)	5.715e-29	0.9345	-0.0331 (0.0334)	0.3224	0.9356	0.2141 (0.081)	0.008194	0.9243	-0.0077 (0.0837)	0.9265	+-+-
APOE	rs2075650	G	0.1431	0.1277 (0.0084)	2.737e-52	0.1313	-0.0216 (0.0244)	0.3763	0.0996	-0.0612 (0.0662)	0.3555	0.1018	0.1084 (0.0752)	0.1497	+--+
PLCG1	rs753381	C	0.5462	0.0391 (0.0059)	2.78e-11	0.9115	0.0466 (0.0302)	0.1227	0.6184	0.0007 (0.04)	0.986	0.8089	0.0731 (0.0575)	0.204	++++
HNF4A	rs1800961	C	0.9685	0.1062 (0.0171)	5.276e-10	0.9934	0.1208 (0.1077)	0.2618	0.9576	0.0968 (0.0984)	0.3254	0.9858	0.0986 (0.1973)	0.6172	++++
Abbreviations: RA risk allele, RAF risk allele frequency, SE standard error
Table S 3b. Association results for known LDL-C loci in Europeans, African-Americans, Hispanics and East Asians
			Europeans			African Americans			Hispanics			East Asians
Gene	SNP	RA	RAF	Beta (SE)	P	RAF	Beta (SE)	P	RAF	Beta (SE)	P	RAF	Beta (SE)	P	Direction
RHCE	rs873308	A	0.5416	0.0265 (0.0056)	1.13e-06	0.2879	-0.0151 (0.0183)	0.4108	0.4383	0.0642 (0.0349)	0.06593	0.2723	0.0215 (0.0434)	0.6201	+-++
PCSK9	rs11591147	G	0.9851	0.3658 (0.0227)	3.11e-59	0.9955	0.4269 (0.1278)	0.0008357	0.988	0.3035 (0.161)	0.05951	NA	NA	NA	+++.
ANGPTL3	rs11207997	C	0.6644	0.0359 (0.0059)	1.02e-09	0.4431	0.0251 (0.0171)	0.1427	0.6175	0.0071 (0.0359)	0.8439	0.7518	-0.1917 (0.0865)	0.02668	+++-
CELSR2	rs4970834	C	0.8147	0.1325 (0.0077)	1.78e-64	0.6911	0.0468 (0.0179)	0.008906	0.8691	0.1921 (0.0508)	0.0001568	0.9465	0.105 (0.0918)	0.2524	++++
APOB	rs562338	G	0.8179	0.1185 (0.0078)	1.21e-51	0.4022	0.0922 (0.0171)	6.541e-08	0.8023	0.0918 (0.0461)	0.04676	0.989	0.2133 (0.1928)	0.2687	++++
ABCG8	rs4299376	G	0.3193	0.069 (0.0063)	4.14e-32	0.1736	0.0778 (0.0238)	0.001062	0.2261	0.0782 (0.045)	0.08209	0.0047	0.2836 (0.3842)	0.4603	++++
HMGCR	rs12916	C	0.4058	0.0705 (0.0057)	9.51e-37	0.251	0.0302 (0.019)	0.1111	0.3901	0.0221 (0.0363)	0.5428	0.5339	0.0537 (0.0396)	0.1752	++++
LPA	rs10455872	G	0.0729	0.1104 (0.0109)	4e-24	0.0127	0.1602 (0.0767)	0.03682	0.0342	0.1273 (0.0961)	0.1851	NA	NA	NA	+++.
KCNH2	rs4725984	T	0.3585	0.0297 (0.0058)	5.45e-07	0.163	0.0121 (0.0227)	0.594	0.2502	-0.0025 (0.0408)	0.9505	0.0473	-0.0876 (0.0966)	0.3648	++--
TRIB1	rs2954029	A	0.531	0.0357 (0.0059)	2.26e-09	0.6623	0.0035 (0.0176)	0.843	0.6036	0.0297 (0.0349)	0.3943	0.486	-0.0197 (0.0396)	0.6181	+++-
ABO	rs630014	G	0.5306	0.0264 (0.0056)	1.86e-06	0.5626	0.003 (0.0167)	0.8594	0.4472	0.0483 (0.0342)	0.1576	0.584	0.0071 (0.0402)	0.8601	++-+
FADS1	rs1535	A	0.6704	0.0376 (0.006)	2.13e-10	0.8434	-0.005 (0.0229)	0.8276	0.4667	0.0405 (0.037)	0.2734	0.4075	0.0082 (0.039)	0.8339	+-++
SH2B3	rs3184504	C	0.5056	0.0394 (0.006)	1.3e-11	0.9174	0.0527 (0.0315)	0.09405	0.7178	0.0855 (0.0388)	0.02743	NA	NA	NA	+++.
CETP	rs3764261	C	0.6775	0.0281 (0.006)	2.2e-06	0.6775	0.0096 (0.0176)	0.5832	0.684	-0.0826 (0.0368)	0.02461	0.8389	-0.0825 (0.0526)	0.1165	++--
HPR	rs2000999	A	0.198	0.0438 (0.007)	3.33e-09	0.0735	-0.1965 (0.1665)	0.238	0.1996	0.1219 (0.1829)	0.5051	0.274	0.0331 (0.0423)	0.4343	+-++
LDLR	rs6511720	G	0.8823	0.1568 (0.0086)	3.35e-75	0.8634	0.187 (0.0241)	7.908e-15	0.9155	0.1767 (0.0622)	0.004486	0.9911	0.1928 (0.2149)	0.3695	++++
GATAD2A	rs3794991	C	0.913	0.0864 (0.01)	5.93e-18	0.9344	-0.0498 (0.0335)	0.1373	0.935	0.0794 (0.0729)	0.2757	0.9265	-0.0852 (0.0726)	0.2404	+-+-
APOE	rs2075650	G	0.1451	0.1297 (0.008)	5.53e-59	0.1313	-0.0335 (0.0246)	0.1732	0.0995	-0.0562 (0.0597)	0.3469	0.0962	0.0456 (0.0681)	0.5035	+--+
Abbreviations: RA risk allele, RAF risk allele frequency, SE standard error
Table S 3c. Association results for known HDL-C loci in Europeans, African-Americans, Hispanics and East Asians
			Europeans			African Americans			Hispanics			East Asians
Gene	SNP	RA	RAF	Beta (SE)	P	RAF	Beta (SE)	P	RAF	Beta (SE)	P	RAF	Beta (SE)	P	Direction
CELSR2	rs646776	C	0.2169	0.0138 (0.0024)	1.35e-08	0.3559	0.0061 (0.0077)	0.4305	0.2312	0.0259 (0.0134)	0.05304	0.0723	0.058 (0.0312)	0.0629	++++
GALNT2	rs2144300	T	0.5994	0.0159 (0.002)	3.37e-16	0.1463	0.0442 (0.0108)	4.665e-05	0.5326	0.013 (0.0121)	0.2836	0.2187	0.0051 (0.0194)	0.7912	++++
APOB	rs676210	A	0.2099	0.0209 (0.0024)	5.1e-18	0.156	0.0241 (0.0091)	0.0079974	0.255	0.0149 (0.0133)	0.26085	NA	NA	NA	+++.
IRS1	rs2943634	A	0.3346	0.0113 (0.0021)	2.36e-09	0.579	0.0048 (0.0066)	0.47333	0.252	0.0148 (0.0141)	0.29316	0.087	0.001 (0.0286)	0.97209	++++
LPA	rs783149	C	0.8402	0.0126 (0.0027)	2.81e-07	0.6447	0.0103 (0.0076)	0.1797	0.6032	0.0003 (0.0127)	0.9812	0.539	-0.0176 (0.0161)	0.2759	+++-
TBL2	rs11974409	G	0.187	0.015 (0.0028)	4.75e-08	0.145	-0.0134 (0.0104)	0.1983	0.1217	0.0093 (0.0182)	0.6091	0.0938	-0.0233 (0.0287)	0.4169	+-+-
LPL	rs13702	C	0.2962	0.0386 (0.0022)	2.32e-75	0.51	0.0396 (0.0065)	1.1355e-09	0.308	0.013 (0.0126)	0.30376	0.21	0.028 (0.0197)	0.15536	++++
TRIB1	rs6982636	A	0.4664	0.0104 (0.002)	1.43e-09	0.368	0.0009 (0.0068)	0.9002	0.396	-0.0178 (0.0116)	0.12642	0.519	0.0128 (0.0164)	0.43418	++-+
GPIHBP1	rs7388248	C	0.2725	0.0106 (0.0022)	6.92e-07	0.49	0.0126 (0.0066)	0.059069	0.363	0.0128 (0.0121)	0.29102	0.485	-0.0101 (0.0154)	0.51394	+++-
ABCA1	rs1883025	C	0.7384	0.0197 (0.0022)	2.29e-20	0.6681	0.0121 (0.0078)	0.1239	0.7225	-0.0022 (0.0132)	0.8657	0.7649	0.043 (0.0195)	0.02743	++-+
F2	rs3136457	C	0.1321	0.0144 (0.0029)	1.75e-07	0.0342	-0.018 (0.0207)	0.383	0.2911	0.0112 (0.0133)	0.3997	0.589	0.0231 (0.0162)	0.1526	+-++
NR1H3	rs7120118	C	0.2935	0.0098 (0.0022)	8.58e-08	0.47	-0.0001 (0.0067)	0.98857	0.392	0.0159 (0.0119)	0.18004	NA	NA	NA	+-+.
C11orf9	rs174535	T	0.666	0.0142 (0.0021)	1.02e-15	0.802	0.0202 (0.0082)	0.0138	0.455	0.0065 (0.0124)	0.59948	0.423	0.0116 (0.0175)	0.50781	++++
APOA5	rs10750097	A	0.7888	0.0241 (0.0024)	9.15e-30	NA	NA	NA	NA	NA	NA	NA	NA	NA	+…
GPR81	rs3922628	A	0.2158	0.0128 (0.0024)	8.34e-09	0.308	0.0015 (0.008)	0.8527	0.1793	0.0142 (0.0153)	0.3514	0.5035	0.0026 (0.0159)	0.8683	++++
SCARB1	rs865716	A	0.4955	0.0119 (0.002)	7.45e-11	0.3134	-0.0015 (0.0078)	0.8465	0.3633	0.0057 (0.0122)	0.6419	0.2221	-0.0251 (0.0195)	0.1975	+-+-
LIPC	rs2070895	A	0.214	0.0356 (0.0024)	2.27e-58	0.5158	0.0378 (0.0073)	2.094e-07	0.4666	0.0568 (0.0121)	2.624e-06	0.3765	0.0187 (0.0167)	0.2628	++++
CETP	rs7499892	C	0.8186	0.0737 (0.0026)	9.58e-195	0.6193	0.066 (0.0074)	2.958e-19	0.7693	0.0749 (0.0137)	4.425e-08	0.8312	0.0872 (0.0211)	3.694e-05	++++
NFATC3	rs2107369	G	0.14	0.0256 (0.0028)	4.47e-20	0.2538	0.01 (0.0083)	0.2299	0.1719	0.0245 (0.0155)	0.1137	0.0707	0.0523 (0.031)	0.09131	++++
LIPG	rs1943981	T	0.8345	0.0254 (0.0027)	6.99e-25	0.9469	-0.0037 (0.0164)	0.8226	0.9126	0.0296 (0.0206)	0.1495	0.8663	0.0128 (0.0233)	0.583	+-++
TOMM40	rs2075650	A	0.8547	0.0228 (0.0028)	1.65e-17	0.869	-0.024 (0.0097)	0.012908	0.9	0.0062 (0.0201)	0.75841	0.902	0.064 (0.0275)	0.019894	+-++
LILRA3	rs103294	T	0.1998	0.016 (0.0025)	1.34e-09	0.095	0.0323 (0.0111)	0.0035761	0.266	0.0179 (0.0138)	0.19341	0.413	-0.0225 (0.0374)	0.54703	+++-
HNF4A	rs1800961	C	0.969	0.0407 (0.0058)	1.23e-12	0.994	-0.0401 (0.0427)	0.34823	0.957	0.0556 (0.0298)	0.061992	0.987	-0.0685 (0.0691)	0.32112	+-+-
PLTP	rs4810479	T	0.7485	0.0159 (0.0023)	5.44e-13	0.602	0.0289 (0.0068)	1.9813e-05	0.544	0.007 (0.0117)	0.5498	NA	NA	NA	+++.
Abbreviations: RA risk allele, RAF risk allele frequency, SE standard error
Table S 3d. Association results for known TG loci in Europeans, African-Americans, Hispanics and East Asians
			Europeans			African American			Hispanics			East Asians
Gene	SNP	RA	RAF	Beta (SE)	P	RAF	Beta (SE)	P	RAF	Beta (SE)	P	RAF	Beta (SE)	P	Direction
DOCK7	rs12130333	C	0.7876	0.0222 (0.0034)	2.25e-11	0.9006	-0.0094 (0.0137)	0.4958	0.8082	0.0197 (0.025)	0.431	0.9877	-0.1333 (0.1531)	0.384	+-+-
GALNT2	rs2144300	C	0.4024	0.0162 (0.0029)	6.39e-09	0.858	0.0206 (0.0124)	0.09809	0.4713	0.0347 (0.0205)	0.09155	0.783	0.0043 (0.0322)	0.8929	++++
APOB	rs673548	G	0.7851	0.0334 (0.0034)	1.61e-24	0.7764	0.017 (0.0099)	0.08408	0.7348	0.0011 (0.0221)	0.9613	0.2772	0.0201 (0.0304)	0.5089	++++
GCKR	rs1260326	T	0.4055	0.0563 (0.0029)	4.05e-88	0.1452	0.0585 (0.0117)	5.538e-07	0.3339	0.0874 (0.021)	3.046e-05	0.4998	0.0744 (0.0281)	0.008034	++++
IRS1	rs2943634	C	0.6675	0.0142 (0.003)	1.34e-06	0.4226	0.0009 (0.0083)	0.915	0.7471	0.0406 (0.0238)	0.08706	0.9129	-0.0062 (0.0483)	0.8982	+++-
AFF1	rs236996	G	0.5969	0.0172 (0.0029)	7.69e-09	0.505	0.001 (0.0082)	0.9079	0.6527	0.0393 (0.0204)	0.0544	0.588	0.066 (0.0274)	0.01615	++++
HLA-DRB1	rs10947317	T	0.0512	0.0318 (0.0066)	7.74e-08	0.0782	0.041 (0.0153)	0.007326	0.0406	0.0172 (0.0504)	0.7323	0.0276	0.29 (0.0902)	0.001297	++++
TBL2	rs11974409	A	0.81	0.0453 (0.0037)	5.53e-39	0.8536	0.0086 (0.0116)	0.4605	0.8795	0.0634 (0.0308)	0.03949	0.9054	-0.0395 (0.0481)	0.4124	+++-
NAT2	rs1961456	G	0.2935	0.0171 (0.0031)	1.23e-09	0.3461	0.0041 (0.0086)	0.6314	0.4319	0.0083 (0.0207)	0.6884	0.6495	0.002 (0.0291)	0.9461	++++
LPL	rs301	T	0.7625	0.0602 (0.0033)	1.28e-82	0.6934	0.0299 (0.0089)	0.0007639	0.7814	0.0528 (0.0238)	0.0267	0.7913	0.0787 (0.0334)	0.01834	++++
TRIB1	rs6982636	G	0.5312	0.0354 (0.0028)	2.56e-39	0.6314	0.0052 (0.0085)	0.5456	0.6046	0.0411 (0.0198)	0.03765	0.4806	0.0696 (0.0275)	0.01127	++++
CYP26A1	rs4418728	G	0.5461	0.0162 (0.0028)	3.46e-09	0.7041	0.0177 (0.0091)	0.05079	0.5682	0.0149 (0.0199)	0.455	0.2162	0.0048 (0.0333)	0.8853	++++
FADS1	rs102275	C	0.3378	0.0243 (0.003)	7.12e-16	0.6515	0.0066 (0.0087)	0.4421	0.6155	0.0433 (0.0208)	0.03712	0.5885	0.0026 (0.0271)	0.9235	++++
BUD13/APOA5	rs6589565	A	0.0772	0.1123 (0.0057)	5.11e-97	0.0151	0.1391 (0.035)	7.024e-05	0.1345	0.1535 (0.0292)	1.511e-07	0.2241	0.1501 (0.032)	2.834e-06	++++
CATSPER2P1	rs10438303	C	0.0946	0.0247 (0.005)	7.51e-07	0.2828	0.0171 (0.0092)	0.06207	0.1825	-0.0146 (0.0258)	0.5718	0.2967	0.0339 (0.0294)	0.2476	++-+
LIPC	rs2070895	A	0.2216	0.0266 (0.0034)	6.29e-15	0.5174	0.0243 (0.0082)	0.003127	0.4655	-0.0102 (0.0204)	0.6152	0.3828	0.015 (0.0278)	0.5907	++-+
CETP	rs3764261	C	0.6758	0.0144 (0.003)	7.43e-07	0.6787	0.0235 (0.0087)	0.007052	0.6821	0.0297 (0.0211)	0.1591	0.8384	0.0659 (0.0365)	0.07072	++++
GATAD2A	rs3794991	C	0.9135	0.0475 (0.005)	8.05e-24	0.934	-0.0054 (0.0165)	0.7425	0.9353	0.0859 (0.0411)	0.03673	0.9231	0.1569 (0.0499)	0.001661	+-++
APOE	rs439401	C	0.6366	0.0342 (0.0029)	2.73e-33	0.8461	0.0129 (0.0115)	0.2621	0.4914	0.0336 (0.0202)	0.09643	0.4418	0.0183 (0.0276)	0.5085	++++
PLTP	rs6065904	A	0.2213	0.0232 (0.0034)	1.85e-10	0.2297	0.0201 (0.0098)	0.04011	0.3494	0.0383 (0.0211)	0.06932	0.3171	-0.0239 (0.0284)	0.3997	+++-
PLA2G6	rs133029	C	0.8966	0.0227 (0.0046)	2.92e-07	0.8673	0.0172 (0.0119)	0.1488	0.9149	0.0178 (0.0353)	0.6154	0.9982	0.7896 (0.3701)	0.03291	++++
Abbreviations: RA risk allele, RAF risk allele frequency, SE standard error
